# Supplementary material
Source: PubMed Central journal article supplement (PMC8777478)
Supplement: sj-pdf-1-ebm-10.1177_15353702211046927.pdf [file sj-pdf-1-ebm-10.1177_15353702211046927.pdf]

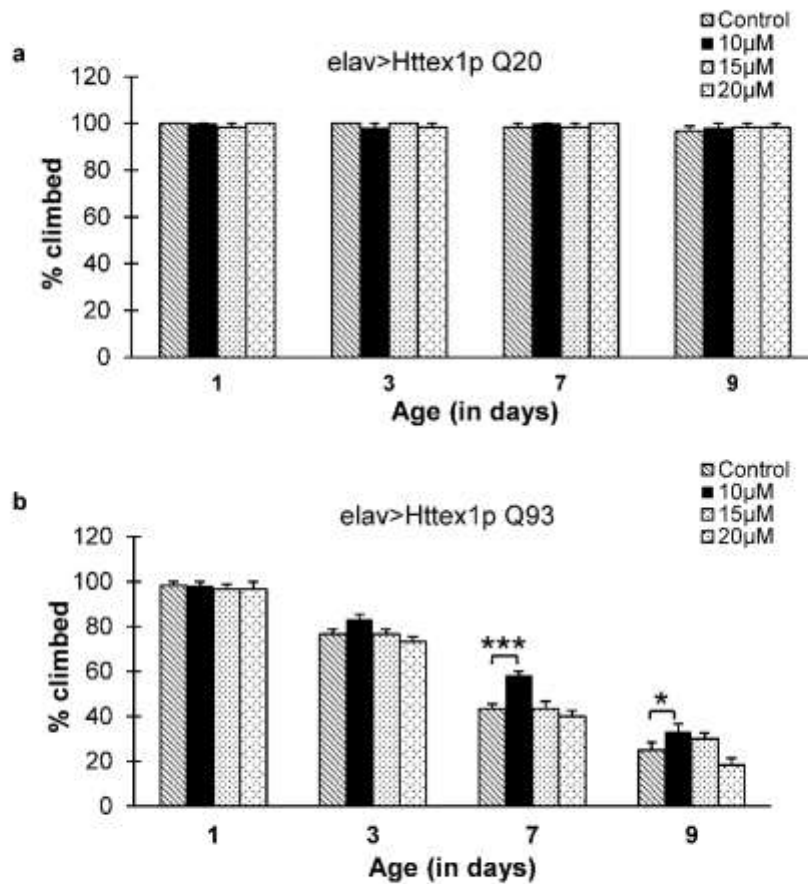

**Supplemental Figure S1: Curcumin improves locomotor function in HD flies.** Vertical locomotor performance of 1, 3, 7 and 9 day old Q20 and Q93 flies fed with 0 (DMSO), 10, 15 and 20µM dose of curcumin since larval stage. (A) All the doses of curcumin fed to Q20 flies did not show any change in their locomotor activity. (B) Administration of 10µM concentration of curcumin significantly suppressed locomotor dysfunction in Q93 flies at day 7 and 9, as compared to the age-matched control. Data for locomotor activity was analyzed using multi-factor analysis of variance (ANOVA) followed by Tukey HSD post hoc test. Values are represented as mean  $\pm$  S.E.M. Tukey HSD  $\alpha$ 0.05, \*\*\*  $p < 0.001$ ; \*  $p < 0.05$ . For each condition,  $n = 20$ .

**Supplemental Table 1: Percent climbing activity of different days old Httex1pQ93 flies fed with 0, 10, 15 & 20 $\mu$ M doses of curcumin.**

| Age (in days) | Condition               | Percent Climbed<br>Mean | <i>n</i> |
|---------------|-------------------------|-------------------------|----------|
| <b>Day 1</b>  | Httex1pQ93              | 98.33333333             | 20       |
|               | Httex1pQ93 (10 $\mu$ M) | 98.33333333             | 20       |
|               | Httex1pQ93 (15 $\mu$ M) | 96.66666667             | 20       |
|               | Httex1pQ93 (20 $\mu$ M) | 96.66666667             | 20       |
| <b>Day 3</b>  | Httex1pQ93              | 76.66666667             | 20       |
|               | Httex1pQ93 (10 $\mu$ M) | 83.33333333             | 20       |
|               | Httex1pQ93 (15 $\mu$ M) | 76.66666667             | 20       |
|               | Httex1pQ93 (20 $\mu$ M) | 73.33333333             | 20       |
| <b>Day 7</b>  | Httex1pQ93              | 43.33333333             | 20       |
|               | Httex1pQ93 (10 $\mu$ M) | 58.33333333             | 20       |
|               | Httex1pQ93 (15 $\mu$ M) | 43.33333333             | 20       |
|               | Httex1pQ93 (20 $\mu$ M) | 40                      | 20       |
| <b>Day 9</b>  | Httex1pQ93              | 25                      | 20       |
|               | Httex1pQ93 (10 $\mu$ M) | 33.33333333             | 20       |
|               | Httex1pQ93 (15 $\mu$ M) | 30                      | 20       |
|               | Httex1pQ93 (20 $\mu$ M) | 18.33333333             | 20       |

**Supplemental Table 2: Significance levels in percent climbing activity of 1, 3, 7 and 9 day old Httex1pQ93 flies fed with different concentrations of curcumin.**

| Age (in days) | (I)<br>(0, 10 $\mu$ M, 15 $\mu$ M,<br>20 $\mu$ M) | (J)<br>(0, 10 $\mu$ M, 15 $\mu$ M,<br>20 $\mu$ M) | Mean<br>Difference (I-<br>J) | Sig. <sup>b</sup> |
|---------------|---------------------------------------------------|---------------------------------------------------|------------------------------|-------------------|
| <b>Day 1</b>  | 0                                                 | 10 $\mu$ M                                        | -1.776E-15                   | 1.000             |
|               |                                                   | 15 $\mu$ M                                        | 1.667                        | .643              |
|               |                                                   | 20 $\mu$ M                                        | 1.667                        | .643              |
|               | 10 $\mu$ M                                        | 0                                                 | 1.776E-15                    | 1.000             |
|               |                                                   | 15 $\mu$ M                                        | 1.667                        | .643              |
|               |                                                   | 20 $\mu$ M                                        | 1.667                        | .643              |

|              |      |      |           |                   |
|--------------|------|------|-----------|-------------------|
|              | 15μM | 0    | -1.667    | .643              |
|              |      | 10μM | -1.667    | .643              |
|              |      | 20μM | .000      | 1.000             |
|              | 20μM | 0    | -1.66     | .643              |
|              |      | 10μM | -1.66     | .643              |
|              |      | 15μM | .00       | 1.000             |
| <b>Day 3</b> | 0    | 10μM | -6.66     | .067              |
|              |      | 15μM | 8.882E-16 | 1.000             |
|              |      | 20μM | 3.333     | .355              |
|              | 10μM | 0    | 6.667     | .067              |
|              |      | 15μM | 6.667     | .067              |
|              |      | 20μM | 10.000*   | <b>.007</b>       |
|              | 15μM | 0    | -8.882E-1 | 1.000             |
|              |      | 10μM | -6.667    | .067              |
|              |      | 20μM | 3.333     | .355              |
|              | 20μM | 0    | -3.333    | .355              |
|              |      | 10μM | -10.000*  | <b>.007</b>       |
|              |      | 15μM | -3.333    | .355              |
| <b>Day 7</b> | 0    | 10μM | -15.000*  | <b>&lt;0.0001</b> |
|              |      | 15μM | .000      | 1.000             |
|              |      | 20μM | 3.333     | .355              |
|              | 10μM | 0    | 15.000*   | <b>&lt;0.0001</b> |
|              |      | 15μM | 15.000*   | <b>&lt;0.0001</b> |
|              |      | 20μM | 18.333*   | <b>&lt;0.0001</b> |
|              | 15μM | 0    | .000      | 1.000             |
|              |      | 10μM | -15.000*  | <b>&lt;0.0001</b> |
|              |      | 20μM | 3.333     | .355              |
|              | 20μM | 0    | -3.333    | .355              |
|              |      | 10μM | -18.333*  | <b>&lt;0.0001</b> |
|              |      | 15μM | -3.333    | .355              |
| <b>Day 9</b> | 0    | 10μM | -8.333*   | <b>.023</b>       |
|              |      | 15μM | -5.000    | .167              |

|            |            |          |                   |
|------------|------------|----------|-------------------|
|            | 20 $\mu$ M | 6.667    | .067              |
| 10 $\mu$ M | 0          | 8.333*   | <b>.023</b>       |
|            | 15 $\mu$ M | 3.333    | .355              |
| 15 $\mu$ M | 20 $\mu$ M | 15.000*  | <b>&lt;0.0001</b> |
|            | 0          | 5.000    | .167              |
|            | 10 $\mu$ M | -3.333   | .355              |
| 20 $\mu$ M | 20 $\mu$ M | 11.667*  | <b>.002</b>       |
|            | 0          | -6.667   | .067              |
|            | 10 $\mu$ M | -15.000* | <b>&lt;0.0001</b> |
|            | 15 $\mu$ M | -11.667* | <b>.002</b>       |

Based on estimated marginal means

\*. The mean difference is significant at the .05 level.

b. Adjustment for multiple comparisons: Least Significant Difference (equivalent to no adjustments).

The significance values were calculated by ANOVA and pairwise comparisons.

**Supplemental Table 3: Survival time of untreated and 10 $\mu$ M curcumin supplemented Httex1pQ93 flies.**

| Condition               | Median | Maximum | P-value | <i>n</i> |
|-------------------------|--------|---------|---------|----------|
| Httex1pQ93              | 5 days | 15 days | 0.3049  | 100      |
| Httex1pQ93 (10 $\mu$ M) | 7 days | 15 days | 0.3049  | 100      |

The median survival time is calculated as the smallest survival time for which the survivor function or survival probability is less than or equal to 0.5.

Median and maximum survival times were calculated using Kaplan-Meier analysis.

**Supplemental Table 4: Survival probability of normal, diseased and 10 $\mu$ M curcumin treated diseased flies.**

| Condition  | Estimated Probability       |                        |                                          |               |                    |                           |
|------------|-----------------------------|------------------------|------------------------------------------|---------------|--------------------|---------------------------|
|            | Time of event (t) (in days) | No. of flies died (Dt) | Flies alive at the start of the day (Nt) | Death (Dt/Nt) | Survival (1-Dt/Nt) | Survival Probability (St) |
| Httex1pQ20 | 0                           | 0                      | 100                                      | 0             | 1                  | 1                         |

|                              |           |    |     |                 |             |                     |
|------------------------------|-----------|----|-----|-----------------|-------------|---------------------|
|                              | 3         | 0  | 100 | 0               | 1           | 1                   |
|                              | 5         | 0  | 100 | 0               | 1           | 1                   |
|                              | 7         | 0  | 100 | 0               | 1           | 1                   |
|                              | 9         | 0  | 100 | 0               | 1           | 1                   |
|                              | 11        | 0  | 100 | 0               | 1           | 1                   |
|                              | 13        | 0  | 100 | 0               | 1           | 1                   |
|                              | 15        | 0  | 100 | 0               | 1           | 1                   |
| <b>Httex1pQ93</b>            | 0         | 0  | 100 | 0               | 1           | 1                   |
|                              | 3         | 21 | 79  | 0.2658227<br>85 | 0.734177215 | 0.734177215         |
|                              | <b>5</b>  | 21 | 58  | 0.3620689<br>66 | 0.637931034 | <b>0.46835443</b>   |
|                              | 7         | 4  | 54  | 0.0740740<br>74 | 0.925925926 | 0.43366151          |
|                              | 9         | 12 | 42  | 0.2857142<br>86 | 0.714285714 | 0.309758221         |
|                              | 11        | 10 | 32  | 0.3125          | 0.6875      | 0.212958777         |
|                              | 13        | 12 | 20  | 0.6             | 0.4         | 0.085183511         |
|                              | <b>15</b> | 16 | 4   | 4               | -3          | <b>-0.255550532</b> |
| <b>Httex1pQ93<br/>(10µM)</b> | 0         | 0  | 100 | 0               | 1           | 1                   |
|                              | 3         | 18 | 82  | 0.2195121<br>95 | 0.780487805 | 0.780487805         |
|                              | 5         | 17 | 65  | 0.2615384<br>62 | 0.738461538 | 0.576360225         |
|                              | <b>7</b>  | 11 | 54  | 0.2037037<br>04 | 0.796296296 | <b>0.458953513</b>  |
|                              | 9         | 11 | 43  | 0.2558139<br>53 | 0.744186047 | 0.3415468           |
|                              | 11        | 6  | 37  | 0.1621621<br>62 | 0.837837838 | 0.286160833         |
|                              | 13        | 12 | 25  | 0.48            | 0.52        | 0.148803633         |
|                              | <b>15</b> | 20 | 5   | 4               | -3          | <b>-0.446410899</b> |

**Supplemental Table 5: Fresh weight in different days old unfed and 10µM curcumin fed Httex1pQ93 and Httex1pQ20 flies.**

| <b>Age (in days)</b> | <b>Condition</b>  | <b>Mean (µg/fly)</b> | <b><i>n</i></b> |
|----------------------|-------------------|----------------------|-----------------|
| <b>Day 0</b>         | Httex1pQ20        | 1184.62              | 50              |
|                      | Httex1pQ20 (10µM) | 1201.84              | 50              |
|                      | Httex1pQ93        | 1138.64              | 50              |
|                      | Httex1pQ93 (10µM) | 1144.6               | 50              |
| <b>Day 3</b>         | Httex1pQ20        | 1261.06              | 50              |
|                      | Httex1pQ20 (10µM) | 1281.52              | 50              |
|                      | Httex1pQ93        | 1473.684             | 50              |
|                      | Httex1pQ93 (10µM) | 1348.06              | 50              |
| <b>Day 5</b>         | Httex1pQ20        | 1241.62              | 50              |
|                      | Httex1pQ20 (10µM) | 1299.82              | 50              |
|                      | Httex1pQ93        | 1666.16              | 50              |
|                      | Httex1pQ93 (10µM) | 1593.7               | 50              |
| <b>Day 7</b>         | Httex1pQ20        | 1237.64              | 50              |
|                      | Httex1pQ20 (10µM) | 1258.46              | 50              |
|                      | Httex1pQ93        | 1543.56              | 50              |
|                      | Httex1pQ93 (10µM) | 1385.44              | 50              |
| <b>Day 9</b>         | Httex1pQ20        | 1171.28              | 50              |
|                      | Httex1pQ20 (10µM) | 1197.016             | 50              |
|                      | Httex1pQ93        | 1268.77              | 50              |
|                      | Httex1pQ93 (10µM) | 1248.5               | 50              |
| <b>Day 11</b>        | Httex1pQ20        | 1218.56              | 50              |
|                      | Httex1pQ20 (10µM) | 1161.06              | 50              |
|                      | Httex1pQ93        | 1057                 | 50              |
|                      | Httex1pQ93 (10µM) | 1201.6               | 50              |
| <b>Day 13</b>        | Httex1pQ20        | 1208.9               | 50              |
|                      | Httex1pQ20 (10µM) | 1258.58              | 50              |
|                      | Httex1pQ93        | 1039.72              | 50              |
|                      | Httex1pQ93 (10µM) | 1090.713             | 50              |

**Supplemental Table 6: Significance levels in fresh body weight of different days old (0 to 13) Httex1pQ20 and Httex1pQ93 flies reared without and with 10 $\mu$ M concentration of curcumin.**

| Age (in days) | (Httex1pQ20, Httex1pQ93) | (I) (0 and 10 $\mu$ M) | (J) (0 and 10 $\mu$ M) | Mean Difference (I-J) | Sig. <sup>b</sup> |
|---------------|--------------------------|------------------------|------------------------|-----------------------|-------------------|
| <b>Day 0</b>  | Httex1pQ20               | 0                      | 10 $\mu$ M             | -17.220               | .643              |
|               |                          | 10 $\mu$ M             | 0                      | 17.220                | .643              |
|               | Httex1pQ93               | 0                      | 10 $\mu$ M             | -5.960                | .872              |
|               |                          | 10 $\mu$ M             | 0                      | 5.960                 | .872              |
| <b>Day 3</b>  | Httex1pQ20               | 0                      | 10 $\mu$ M             | -20.460               | .582              |
|               |                          | 10 $\mu$ M             | 0                      | 20.460                | .582              |
|               | Httex1pQ93               | 0                      | 10 $\mu$ M             | 125.624*              | <b>.001</b>       |
|               |                          | 10 $\mu$ M             | 0                      | -125.624*             | <b>.001</b>       |
| <b>Day 5</b>  | Httex1pQ20               | 0                      | 10 $\mu$ M             | -58.200               | .119              |
|               |                          | 10 $\mu$ M             | 0                      | 58.200                | .119              |
|               | Httex1pQ93               | 0                      | 10 $\mu$ M             | 72.460                | <b>.053</b>       |
|               |                          | 10 $\mu$ M             | 0                      | -72.460               | <b>.053</b>       |
| <b>Day 7</b>  | Httex1pQ20               | 0                      | 10 $\mu$ M             | -20.820               | .575              |
|               |                          | 10 $\mu$ M             | 0                      | 20.820                | .575              |
|               | Httex1pQ93               | 0                      | 10 $\mu$ M             | 158.120*              | <b>&lt;0.0001</b> |
|               |                          | 10 $\mu$ M             | 0                      | -158.120*             | <b>&lt;0.0001</b> |
| <b>Day 9</b>  | Httex1pQ20               | 0                      | 10 $\mu$ M             | -25.736               | .489              |
|               |                          | 10 $\mu$ M             | 0                      | 25.736                | .489              |
|               | Httex1pQ93               | 0                      | 10 $\mu$ M             | 20.278                | .585              |
|               |                          | 10 $\mu$ M             | 0                      | -20.278               | .585              |
| <b>Day 11</b> | Httex1pQ20               | 0                      | 10 $\mu$ M             | 57.500                | .123              |
|               |                          | 10 $\mu$ M             | 0                      | -57.500               | .123              |
|               | Httex1pQ93               | 0                      | 10 $\mu$ M             | -141.980*             | <b>&lt;0.0001</b> |
|               |                          | 10 $\mu$ M             | 0                      | 141.980*              | <b>&lt;0.0001</b> |
| <b>Day 13</b> | Httex1pQ20               | 0                      | 10 $\mu$ M             | -49.680               | .182              |

|            |            |            |         |      |
|------------|------------|------------|---------|------|
|            | 10 $\mu$ M | 0          | 49.680  | .182 |
| Httex1pQ93 | 0          | 10 $\mu$ M | -50.993 | .171 |
|            | 10 $\mu$ M | 0          | 50.993  | .171 |

Based on estimated marginal means

\*. The mean difference is significant at the .05 level.

b. Adjustment for multiple comparisons: Least Significant Difference (equivalent to no adjustments)

The significance values were calculated by ANOVA and pairwise comparisons.

**Supplemental Table 7: Dry weight of different days old untreated and 10 $\mu$ M curcumin supplemented Httex1pQ20 and Httex1pQ93 flies.**

| Age (in days) | Condition               | Mean ( $\mu$ g/fly) | <i>n</i> |
|---------------|-------------------------|---------------------|----------|
| <b>Day 0</b>  | Httex1pQ20              | 348.04              | 50       |
|               | Httex1pQ20 (10 $\mu$ M) | 357.24              | 50       |
|               | Httex1pQ93              | 355.74              | 50       |
|               | Httex1pQ93 (10 $\mu$ M) | 351.38              | 50       |
| <b>Day 3</b>  | Httex1pQ20              | 448.767             | 50       |
|               | Httex1pQ20 (10 $\mu$ M) | 457.92              | 50       |
|               | Httex1pQ93              | 474.8               | 50       |
|               | Httex1pQ93 (10 $\mu$ M) | 430.34              | 50       |
| <b>Day 5</b>  | Httex1pQ20              | 424.28              | 50       |
|               | Httex1pQ20 (10 $\mu$ M) | 457                 | 50       |
|               | Httex1pQ93              | 556.1               | 50       |
|               | Httex1pQ93 (10 $\mu$ M) | 533.52              | 50       |
| <b>Day 7</b>  | Httex1pQ20              | 432.52              | 50       |
|               | Httex1pQ20 (10 $\mu$ M) | 438.42              | 50       |
|               | Httex1pQ93              | 520.92              | 50       |
|               | Httex1pQ93 (10 $\mu$ M) | 454.54              | 50       |
| <b>Day 9</b>  | Httex1pQ20              | 394.44              | 50       |
|               | Httex1pQ20 (10 $\mu$ M) | 397.78              | 50       |
|               | Httex1pQ93              | 389.94              | 50       |
|               | Httex1pQ93 (10 $\mu$ M) | 399.24              | 50       |
| <b>Day 11</b> | Httex1pQ20              | 416.96              | 50       |



|               |                         |         |    |
|---------------|-------------------------|---------|----|
|               | Httex1pQ20 (10 $\mu$ M) | 392.36  | 50 |
|               | Httex1pQ93              | 324.42  | 50 |
|               | Httex1pQ93 (10 $\mu$ M) | 374.8   | 50 |
| <b>Day 13</b> | Httex1pQ20              | 411.42  | 50 |
|               | Httex1pQ20 (10 $\mu$ M) | 434.2   | 50 |
|               | Httex1pQ93              | 330.12  | 50 |
|               | Httex1pQ93 (10 $\mu$ M) | 341.833 | 50 |

**Supplemental Table 8: Significance levels in dry weight of different days old Httex1pQ20 and Httex1pQ93 flies reared without and with 10 $\mu$ M dose of curcumin.**

| <b>Age (in days)</b> | <b>(Httex1pQ20, Httex1pQ93)</b> | <b>(I) (0 and 10<math>\mu</math>M)</b> | <b>(J) (0 and 10<math>\mu</math>M)</b> | <b>Mean Difference (I-J)</b> | <b>Sig.<sup>b</sup></b> |
|----------------------|---------------------------------|----------------------------------------|----------------------------------------|------------------------------|-------------------------|
| <b>Day 0</b>         | Httex1pQ20                      | 0                                      | 10 $\mu$ M                             | -9.200                       | .371                    |
|                      |                                 | 10 $\mu$ M                             | 0                                      | 9.200                        | .371                    |
|                      | Httex1pQ93                      | 0                                      | 10 $\mu$ M                             | 4.360                        | .671                    |
|                      |                                 | 10 $\mu$ M                             | 0                                      | -4.360                       | .671                    |
| <b>Day 3</b>         | Httex1pQ20                      | 0                                      | 10 $\mu$ M                             | -9.153                       | .374                    |
|                      |                                 | 10 $\mu$ M                             | 0                                      | 9.153                        | .374                    |
|                      | Httex1pQ93                      | 0                                      | 10 $\mu$ M                             | 44.469*                      | <b>&lt;0.0001</b>       |
|                      |                                 | 10 $\mu$ M                             | 0                                      | -44.469*                     | <b>&lt;0.0001</b>       |
| <b>Day 5</b>         | Httex1pQ20                      | 0                                      | 10 $\mu$ M                             | -32.720*                     | <b>.002</b>             |
|                      |                                 | 10 $\mu$ M                             | 0                                      | 32.720*                      | <b>.002</b>             |
|                      | Httex1pQ93                      | 0                                      | 10 $\mu$ M                             | 22.580*                      | <b>.030</b>             |
|                      |                                 | 10 $\mu$ M                             | 0                                      | -22.580*                     | <b>.030</b>             |
| <b>Day 7</b>         | Httex1pQ20                      | 0                                      | 10 $\mu$ M                             | -5.900                       | .566                    |
|                      |                                 | 10 $\mu$ M                             | 0                                      | 5.900                        | .566                    |
|                      | Httex1pQ93                      | 0                                      | 10 $\mu$ M                             | 66.380*                      | <b>&lt;0.0001</b>       |
|                      |                                 | 10 $\mu$ M                             | 0                                      | -66.380*                     | <b>&lt;0.0001</b>       |
| <b>Day 9</b>         | Httex1pQ20                      | 0                                      | 10 $\mu$ M                             | -3.340                       | .745                    |
|                      |                                 | 10 $\mu$ M                             | 0                                      | 3.340                        | .745                    |

|               |            |            |            |          |                   |
|---------------|------------|------------|------------|----------|-------------------|
|               | Httex1pQ93 | 0          | 10 $\mu$ M | -9.300   | .366              |
|               |            | 10 $\mu$ M | 0          | 9.300    | .366              |
| <b>Day 11</b> | Httex1pQ20 | 0          | 10 $\mu$ M | 24.600*  | <b>.018</b>       |
|               |            | 10 $\mu$ M | 0          | -24.600* | <b>.018</b>       |
|               | Httex1pQ93 | 0          | 10 $\mu$ M | -50.260* | <b>&lt;0.0001</b> |
|               |            | 10 $\mu$ M | 0          | 50.260*  | <b>&lt;0.0001</b> |
| <b>Day 13</b> | Httex1pQ20 | 0          | 10 $\mu$ M | -22.780* | <b>.028</b>       |
|               |            | 10 $\mu$ M | 0          | 22.780*  | <b>.028</b>       |
|               | Httex1pQ93 | 0          | 10 $\mu$ M | -11.713  | .256              |
|               |            | 10 $\mu$ M | 0          | 11.713   | .256              |

Based on estimated marginal means

\*. The mean difference is significant at the .05 level.

b. Adjustment for multiple comparisons: Least Significant Difference (equivalent to no adjustments).

The significance values were obtained after performing ANOVA and pairwise comparisons.

**Supplemental Table 9: Water content in different days old untreated and 10 $\mu$ M curcumin treated Httex1pQ20 and Httex1pQ93 flies.**

| <b>Age (in days)</b> | <b>Condition</b>        | <b>Mean (<math>\mu</math>g/fly)</b> | <b>n</b> |
|----------------------|-------------------------|-------------------------------------|----------|
| <b>Day 0</b>         | Httex1pQ20              | 836.58                              | 50       |
|                      | Httex1pQ20 (10 $\mu$ M) | 844.6                               | 50       |
|                      | Httex1pQ93              | 782.9                               | 50       |
|                      | Httex1pQ93 (10 $\mu$ M) | 793.22                              | 50       |
| <b>Day 3</b>         | Httex1pQ20              | 812.293                             | 50       |
|                      | Httex1pQ20 (10 $\mu$ M) | 823.6                               | 50       |
|                      | Httex1pQ93              | 998.876                             | 50       |
|                      | Httex1pQ93 (10 $\mu$ M) | 917.72                              | 50       |
| <b>Day 5</b>         | Httex1pQ20              | 817.34                              | 50       |
|                      | Httex1pQ20 (10 $\mu$ M) | 842.82                              | 50       |
|                      | Httex1pQ93              | 1110.06                             | 50       |
|                      | Httex1pQ93 (10 $\mu$ M) | 1060.18                             | 50       |
| <b>Day 7</b>         | Httex1pQ20              | 805.12                              | 50       |
|                      | Httex1pQ20 (10 $\mu$ M) | 820.04                              | 50       |

|               |                         |         |    |
|---------------|-------------------------|---------|----|
|               | Httex1pQ93              | 1022.64 | 50 |
|               | Httex1pQ93 (10 $\mu$ M) | 930.9   | 50 |
| <b>Day 9</b>  | Httex1pQ20              | 776.84  | 50 |
|               | Httex1pQ20 (10 $\mu$ M) | 799.236 | 50 |
|               | Httex1pQ93              | 878.838 | 50 |
|               | Httex1pQ93 (10 $\mu$ M) | 849.26  | 50 |
| <b>Day 11</b> | Httex1pQ20              | 801.6   | 50 |
|               | Httex1pQ20 (10 $\mu$ M) | 768.7   | 50 |
|               | Httex1pQ93              | 735.2   | 50 |
|               | Httex1pQ93 (10 $\mu$ M) | 826.92  | 50 |
| <b>Day 13</b> | Httex1pQ20              | 797.48  | 50 |
|               | Httex1pQ20 (10 $\mu$ M) | 824.38  | 50 |
|               | Httex1pQ93              | 709.6   | 50 |
|               | Httex1pQ93 (10 $\mu$ M) | 748.88  | 50 |

**Supplemental Table 10: Significance levels in water content of 0 to 13 days old Httex1pQ20 and Httex1pQ93 flies supplemented without and with 10 $\mu$ M dose of curcumin.**

| <b>Days</b>  | <b>(Httex1pQ20,<br/>Httex1pQ93)</b> | <b>(I)<br/>(0 and<br/>10<math>\mu</math>M)</b> | <b>(J)<br/>(0 and<br/>10<math>\mu</math>M)</b> | <b>Mean<br/>Difference<br/>(I-J)</b> | <b>Sig.<sup>b</sup></b> |
|--------------|-------------------------------------|------------------------------------------------|------------------------------------------------|--------------------------------------|-------------------------|
| <b>Day 0</b> | Httex1pQ20                          | 0                                              | 10 $\mu$ M                                     | -8.020                               | .794                    |
|              |                                     | 10 $\mu$ M                                     | 0                                              | 8.020                                | .794                    |
|              | Httex1pQ93                          | 0                                              | 10 $\mu$ M                                     | -10.320                              | .737                    |
|              |                                     | 10 $\mu$ M                                     | 0                                              | 10.320                               | .737                    |
| <b>Day 3</b> | Httex1pQ20                          | 0                                              | 10 $\mu$ M                                     | -11.307                              | .713                    |
|              |                                     | 10 $\mu$ M                                     | 0                                              | 11.307                               | .713                    |
|              | Httex1pQ93                          | 0                                              | 10 $\mu$ M                                     | 81.156*                              | <b>.009</b>             |
|              |                                     | 10 $\mu$ M                                     | 0                                              | -81.156*                             | <b>.009</b>             |
| <b>Day 5</b> | Httex1pQ20                          | 0                                              | 10 $\mu$ M                                     | -25.480                              | .407                    |

|               |            |      |      |          |             |
|---------------|------------|------|------|----------|-------------|
|               |            | 10μM | 0    | 25.480   | .407        |
|               | Httex1pQ93 | 0    | 10μM | 49.880   | .106        |
|               |            | 10μM | 0    | -49.880  | .106        |
| <b>Day 7</b>  | Httex1pQ20 | 0    | 10μM | -14.920  | .627        |
|               |            | 10μM | 0    | 14.920   | .627        |
|               | Httex1pQ93 | 0    | 10μM | 91.740*  | <b>.003</b> |
|               |            | 10μM | 0    | -91.740* | <b>.003</b> |
| <b>Day 9</b>  | Httex1pQ20 | 0    | 10μM | -22.396  | .466        |
|               |            | 10μM | 0    | 22.396   | .466        |
|               | Httex1pQ93 | 0    | 10μM | 29.578   | .337        |
|               |            | 10μM | 0    | -29.578  | .337        |
| <b>Day 11</b> | Httex1pQ20 | 0    | 10μM | 32.900   | .285        |
|               |            | 10μM | 0    | -32.900  | .285        |
|               | Httex1pQ93 | 0    | 10μM | -91.720* | <b>.003</b> |
|               |            | 10μM | 0    | 91.720*  | <b>.003</b> |
| <b>Day 13</b> | Httex1pQ20 | 0    | 10μM | -26.900  | .382        |
|               |            | 10μM | 0    | 26.900   | .382        |
|               | Httex1pQ93 | 0    | 10μM | -39.280  | .203        |
|               |            | 10μM | 0    | 39.280   | .203        |

Based on estimated marginal means

\*. The mean difference is significant at the .05 level.

b. Adjustment for multiple comparisons: Least Significant Difference (equivalent to no adjustments).

The significance values were calculated by ANOVA and pairwise comparisons.

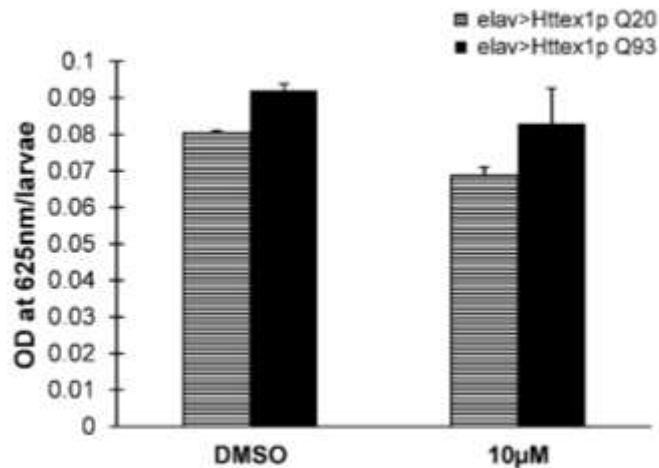

**Supplemental Figure S2: Feeding behavior remain unchanged at larval stage upon curcumin supplementation.** Feeding of normal (elav>Httex1p Q20) and diseased (elav>Httex1p Q93) female larvae reared on control or 10µM curcumin supplemented diet was measured using colorimetric dye intake assay. No difference was observed in the food intake of control and diseased larvae supplemented without or with effective concentration of curcumin. Data was analyzed using two-way ANOVA and values are represented as mean  $\pm$  S.E.M. For each group,  $n = 20$  larvae.

**Supplemental Table 11: Dye OD upon larval feeding of untreated and 10µM curcumin treated Httex1pQ20 and Httex1pQ93 genotypes.**

| Condition         | Mean     | <i>n</i> |
|-------------------|----------|----------|
| Httex1pQ20        | 0.080565 | 20       |
| Httex1pQ20 (10µM) | 0.068615 | 20       |
| Httex1pQ93        | 0.09203  | 20       |
| Httex1pQ93 (10µM) | 0.082965 | 20       |

**Supplemental Table 12: Dye OD upon adult feeding of 6, 8 and 12 days old Httex1pQ20 and Httex1pQ93 flies reared without and with 10µM curcumin supplementation.**

| Age (in days) | Condition         | Mean    | <i>n</i> |
|---------------|-------------------|---------|----------|
| Day 6         | Httex1pQ20        | 0.01331 | 20       |
|               | Httex1pQ20 (10µM) | 0.01581 | 20       |
|               | Httex1pQ93        | 0.01201 | 20       |

|               |                         |          |    |
|---------------|-------------------------|----------|----|
|               | Httex1pQ93 (10 $\mu$ M) | 0.01595  | 20 |
| <b>Day 8</b>  | Httex1pQ20              | 0.01105  | 20 |
|               | Httex1pQ20 (10 $\mu$ M) | 0.01173  | 20 |
|               | Httex1pQ93              | 0.01041  | 20 |
|               | Httex1pQ93 (10 $\mu$ M) | 0.010016 | 20 |
| <b>Day 12</b> | Httex1pQ20              | 0.0114   | 20 |
|               | Httex1pQ20 (10 $\mu$ M) | 0.01095  | 20 |
|               | Httex1pQ93              | 0.01005  | 20 |
|               | Httex1pQ93 (10 $\mu$ M) | 0.01081  | 20 |

**Supplemental Table 13: Significance levels in dye OD after adult food intake of 6, 8 and 12 days old Httex1pQ20 and Httex1pQ93 flies reared without and with 10 $\mu$ M dose of curcumin.**

| Age (in days) | (Httex1pQ20, Httex1pQ93) | (I) (0 and 10 $\mu$ M) | (J) (0 and 10 $\mu$ M) | Mean Difference (I-J) | Sig. <sup>b</sup> |
|---------------|--------------------------|------------------------|------------------------|-----------------------|-------------------|
| <b>Day 6</b>  | Httex1pQ20               | 0                      | 10 $\mu$ M             | -.003                 | .404              |
|               |                          | 10 $\mu$ M             | 0                      | .003                  | .404              |
|               | Httex1pQ93               | 0                      | 10 $\mu$ M             | -.004                 | .193              |
|               |                          | 10 $\mu$ M             | 0                      | .004                  | .193              |
| <b>Day 8</b>  | Httex1pQ20               | 0                      | 10 $\mu$ M             | -.001                 | .820              |
|               |                          | 10 $\mu$ M             | 0                      | .001                  | .820              |
|               | Httex1pQ93               | 0                      | 10 $\mu$ M             | .000                  | .895              |
|               |                          | 10 $\mu$ M             | 0                      | .000                  | .895              |
| <b>Day 12</b> | Httex1pQ20               | 0                      | 10 $\mu$ M             | .000                  | .881              |
|               |                          | 10 $\mu$ M             | 0                      | .000                  | .881              |
|               | Httex1pQ93               | 0                      | 10 $\mu$ M             | -.001                 | .797              |
|               |                          | 10 $\mu$ M             | 0                      | .001                  | .797              |

Based on estimated marginal means

a. Adjustment for multiple comparisons: Least Significant Difference (equivalent to no adjustments).

The statistical values were obtained after performing ANOVA and pairwise comparisons.

**Supplemental Table 14: Protein content in different days old untreated and 10µM curcumin treated Httex1pQ20 and Httex1pQ93 flies.**

| <b>Age (in days)</b> | <b>Condition</b>  | <b>Mean (µg/fly)</b> | <b><i>n</i></b> |
|----------------------|-------------------|----------------------|-----------------|
| <b>Day 0</b>         | Httex1pQ20        | 246.222              | 20              |
|                      | Httex1pQ20 (10µM) | 231.958              | 20              |
|                      | Httex1pQ93        | 255.03               | 20              |
|                      | Httex1pQ93 (10µM) | 253.24               | 20              |
| <b>Day 3</b>         | Httex1pQ20        | 309                  | 20              |
|                      | Httex1pQ20 (10µM) | 302.93               | 20              |
|                      | Httex1pQ93        | 319.18               | 20              |
|                      | Httex1pQ93 (10µM) | 326.99               | 20              |
| <b>Day 5</b>         | Httex1pQ20        | 339.819              | 20              |
|                      | Httex1pQ20 (10µM) | 350.388              | 20              |
|                      | Httex1pQ93        | 343.17               | 20              |
|                      | Httex1pQ93 (10µM) | 355.08               | 20              |
| <b>Day 7</b>         | Httex1pQ20        | 315.625              | 20              |
|                      | Httex1pQ20 (10µM) | 318.736              | 20              |
|                      | Httex1pQ93        | 342.9                | 20              |
|                      | Httex1pQ93 (10µM) | 335.04               | 20              |
| <b>Day 9</b>         | Httex1pQ20        | 282.583              | 20              |
|                      | Httex1pQ20 (10µM) | 321.444              | 20              |
|                      | Httex1pQ93        | 319.36               | 20              |
|                      | Httex1pQ93 (10µM) | 313.33               | 20              |
| <b>Day 11</b>        | Httex1pQ20        | 301.083              | 20              |
|                      | Httex1pQ20 (10µM) | 278.93               | 20              |
|                      | Httex1pQ93        | 279.57               | 20              |
|                      | Httex1pQ93 (10µM) | 269.5                | 20              |
| <b>Day 13</b>        | Httex1pQ20        | 285.375              | 20              |
|                      | Httex1pQ20 (10µM) | 277.972              | 20              |
|                      | Httex1pQ93        | 268.92               | 20              |
|                      | Httex1pQ93 (10µM) | 261.71               | 20              |

**Supplemental Table 15: Significance levels in protein content of 0 to 13 days old Httex1pQ20 and Httex1pQ93 flies reared on food supplemented without and with 10 $\mu$ M concentration of curcumin.**

| <b>Age (in days)</b> | <b>(Httex1pQ20, Httex1pQ93)</b> | <b>(I) (0 and 10<math>\mu</math>M)</b> | <b>(J) (0 and 10<math>\mu</math>M)</b> | <b>Mean Difference (I-J)</b> | <b>Sig.<sup>b</sup></b> |
|----------------------|---------------------------------|----------------------------------------|----------------------------------------|------------------------------|-------------------------|
| <b>Day 0</b>         | Httex1pQ20                      | 0                                      | 10 $\mu$ M                             | 14.264                       | .457                    |
|                      |                                 | 10 $\mu$ M                             | 0                                      | -14.264                      | .457                    |
|                      | Httex1pQ93                      | 0                                      | 10 $\mu$ M                             | 1.792                        | .925                    |
|                      |                                 | 10 $\mu$ M                             | 0                                      | -1.792                       | .925                    |
| <b>Day 3</b>         | Httex1pQ20                      | 0                                      | 10 $\mu$ M                             | 6.069                        | .751                    |
|                      |                                 | 10 $\mu$ M                             | 0                                      | -6.069                       | .751                    |
|                      | Httex1pQ93                      | 0                                      | 10 $\mu$ M                             | -7.806                       | .683                    |
|                      |                                 | 10 $\mu$ M                             | 0                                      | 7.806                        | .683                    |
| <b>Day 5</b>         | Httex1pQ20                      | 0                                      | 10 $\mu$ M                             | -10.569                      | .581                    |
|                      |                                 | 10 $\mu$ M                             | 0                                      | 10.569                       | .581                    |
|                      | Httex1pQ93                      | 0                                      | 10 $\mu$ M                             | -11.917                      | .534                    |
|                      |                                 | 10 $\mu$ M                             | 0                                      | 11.917                       | .534                    |
| <b>Day 7</b>         | Httex1pQ20                      | 0                                      | 10 $\mu$ M                             | -3.111                       | .871                    |
|                      |                                 | 10 $\mu$ M                             | 0                                      | 3.111                        | .871                    |
|                      | Httex1pQ93                      | 0                                      | 10 $\mu$ M                             | 9.875                        | .606                    |
|                      |                                 | 10 $\mu$ M                             | 0                                      | -9.875                       | .606                    |
| <b>Day 9</b>         | Httex1pQ20                      | 0                                      | 10 $\mu$ M                             | -38.861 <sup>*</sup>         | .044                    |
|                      |                                 | 10 $\mu$ M                             | 0                                      | 38.861 <sup>*</sup>          | .044                    |
|                      | Httex1pQ93                      | 0                                      | 10 $\mu$ M                             | 6.028                        | .753                    |
|                      |                                 | 10 $\mu$ M                             | 0                                      | -6.028                       | .753                    |
| <b>Day 11</b>        | Httex1pQ20                      | 0                                      | 10 $\mu$ M                             | 22.153                       | .248                    |
|                      |                                 | 10 $\mu$ M                             | 0                                      | -22.153                      | .248                    |
|                      | Httex1pQ93                      | 0                                      | 10 $\mu$ M                             | 10.069                       | .599                    |
|                      |                                 | 10 $\mu$ M                             | 0                                      | -10.069                      | .599                    |
| <b>Day 13</b>        | Httex1pQ20                      | 0                                      | 10 $\mu$ M                             | 7.403                        | .699                    |



|            |      |      |        |      |
|------------|------|------|--------|------|
|            | 10μM | 0    | -7.403 | .699 |
| Httex1pQ93 | 0    | 10μM | 7.208  | .706 |
|            | 10μM | 0    | -7.208 | .706 |

Based on estimated marginal means

\*. The mean difference is significant at the .05 level.

b. Adjustment for multiple comparisons: Least Significant Difference (equivalent to no adjustments).

P-values were calculated by ANOVA and pairwise comparisons.

**Supplemental Table 16: Glycogen content in different days old untreated and 10μM curcumin treated Httex1pQ20 and Httex1pQ93 flies.**

| Age (in days) | Condition         | Mean (μg/fly) | <i>n</i> |
|---------------|-------------------|---------------|----------|
| <b>Day 0</b>  | Httex1pQ20        | 24.547        | 20       |
|               | Httex1pQ20 (10μM) | 22.833        | 20       |
|               | Httex1pQ93        | 24.82         | 20       |
|               | Httex1pQ93 (10μM) | 24.793        | 20       |
| <b>Day 3</b>  | Httex1pQ20        | 49.01         | 20       |
|               | Httex1pQ20 (10μM) | 53.398        | 20       |
|               | Httex1pQ93        | 66.85         | 20       |
|               | Httex1pQ93 (10μM) | 65.75         | 20       |
| <b>Day 5</b>  | Httex1pQ20        | 61.23         | 20       |
|               | Httex1pQ20 (10μM) | 63.768        | 20       |
|               | Httex1pQ93        | 76.11         | 20       |
|               | Httex1pQ93 (10μM) | 73.817        | 20       |
| <b>Day 7</b>  | Httex1pQ20        | 53.14         | 20       |
|               | Httex1pQ20 (10μM) | 53.933        | 20       |
|               | Httex1pQ93        | 66.58         | 20       |
|               | Httex1pQ93 (10μM) | 67.022        | 20       |
| <b>Day 9</b>  | Httex1pQ20        | 49.057        | 20       |
|               | Httex1pQ20 (10μM) | 51.577        | 20       |
|               | Httex1pQ93        | 46.12         | 20       |
|               | Httex1pQ93 (10μM) | 44.877        | 20       |
| <b>Day 11</b> | Httex1pQ20        | 42.28         | 20       |

|               |                   |        |    |
|---------------|-------------------|--------|----|
|               | Httex1pQ20 (10μM) | 40.422 | 20 |
|               | Httex1pQ93        | 25.77  | 20 |
|               | Httex1pQ93 (10μM) | 27.84  | 20 |
| <b>Day 13</b> | Httex1pQ20        | 32.51  | 20 |
|               | Httex1pQ20 (10μM) | 36.57  | 20 |
|               | Httex1pQ93        | 27.94  | 20 |
|               | Httex1pQ93 (10μM) | 26.572 | 20 |

**Supplemental Table 17: Significance levels in glycogen content of different days old Httex1pQ20 and Httex1pQ93 flies reared on food supplemented without and with 10μM dose of curcumin.**

| <b>Age (in days)</b> | <b>(Httex1pQ20, Httex1pQ93)</b> | <b>(I) (0 and 10μM)</b> | <b>(J) (0 and 10μM)</b> | <b>Mean Difference (I-J)</b> | <b>Sig.<sup>b</sup></b> |
|----------------------|---------------------------------|-------------------------|-------------------------|------------------------------|-------------------------|
| <b>Day 0</b>         | Httex1pQ20                      | 0                       | 10μM                    | 1.715                        | .745                    |
|                      |                                 | 10μM                    | 0                       | -1.715                       | .745                    |
|                      | Httex1pQ93                      | 0                       | 10μM                    | .021                         | .997                    |
|                      |                                 | 10μM                    | 0                       | -.021                        | .997                    |
| <b>Day 3</b>         | Httex1pQ20                      | 0                       | 10μM                    | -4.387                       | .405                    |
|                      |                                 | 10μM                    | 0                       | 4.387                        | .405                    |
|                      | Httex1pQ93                      | 0                       | 10μM                    | 1.098                        | .835                    |
|                      |                                 | 10μM                    | 0                       | -1.098                       | .835                    |
| <b>Day 5</b>         | Httex1pQ20                      | 0                       | 10μM                    | -2.530                       | .631                    |
|                      |                                 | 10μM                    | 0                       | 2.530                        | .631                    |
|                      | Httex1pQ93                      | 0                       | 10μM                    | 2.295                        | .663                    |
|                      |                                 | 10μM                    | 0                       | -2.295                       | .663                    |
| <b>Day 7</b>         | Httex1pQ20                      | 0                       | 10μM                    | -.788                        | .881                    |
|                      |                                 | 10μM                    | 0                       | .788                         | .881                    |
|                      | Httex1pQ93                      | 0                       | 10μM                    | -.440                        | .933                    |
|                      |                                 | 10μM                    | 0                       | .440                         | .933                    |
| <b>Day 9</b>         | Httex1pQ20                      | 0                       | 10μM                    | -1.775                       | .736                    |

|               |            |            |            |        |      |
|---------------|------------|------------|------------|--------|------|
|               |            | 10 $\mu$ M | 0          | 1.775  | .736 |
|               | Httex1pQ93 | 0          | 10 $\mu$ M | 1.238  | .814 |
|               |            | 10 $\mu$ M | 0          | -1.238 | .814 |
| <b>Day 11</b> | Httex1pQ20 | 0          | 10 $\mu$ M | 1.923  | .715 |
|               |            | 10 $\mu$ M | 0          | -1.923 | .715 |
|               | Httex1pQ93 | 0          | 10 $\mu$ M | -2.067 | .695 |
|               |            | 10 $\mu$ M | 0          | 2.067  | .695 |
| <b>Day 13</b> | Httex1pQ20 | 0          | 10 $\mu$ M | -4.068 | .440 |
|               |            | 10 $\mu$ M | 0          | 4.068  | .440 |
|               | Httex1pQ93 | 0          | 10 $\mu$ M | 1.368  | .795 |
|               |            | 10 $\mu$ M | 0          | -1.368 | .795 |

Based on estimated marginal means

a. Adjustment for multiple comparisons: Least Significant Difference (equivalent to no adjustments).

The p-values were calculated by ANOVA and pairwise comparisons.

**Supplemental Table 18: Trehalose content in different days old untreated and 10 $\mu$ M curcumin treated Httex1pQ20 and Httex1pQ93 flies.**

| Age (in days) | Condition               | Mean ( $\mu$ g/fly) | <i>n</i> |
|---------------|-------------------------|---------------------|----------|
| <b>Day 0</b>  | Httex1pQ20              | 5.5055              | 20       |
|               | Httex1pQ20 (10 $\mu$ M) | 5.563               | 20       |
|               | Httex1pQ93              | 4.947               | 20       |
|               | Httex1pQ93 (10 $\mu$ M) | 4.713               | 20       |
| <b>Day 3</b>  | Httex1pQ20              | 12.233              | 20       |
|               | Httex1pQ20 (10 $\mu$ M) | 10.261              | 20       |
|               | Httex1pQ93              | 15.322              | 20       |
|               | Httex1pQ93 (10 $\mu$ M) | 14.452              | 20       |
| <b>Day 5</b>  | Httex1pQ20              | 12.394              | 20       |
|               | Httex1pQ20 (10 $\mu$ M) | 11.161              | 20       |
|               | Httex1pQ93              | 13.005              | 20       |
|               | Httex1pQ93 (10 $\mu$ M) | 11.816              | 20       |
| <b>Day 7</b>  | Httex1pQ20              | 11.247              | 20       |
|               | Httex1pQ20 (10 $\mu$ M) | 10.297              | 20       |

|               |                   |        |    |
|---------------|-------------------|--------|----|
|               | Httex1pQ93        | 12.594 | 20 |
|               | Httex1pQ93 (10µM) | 8.0027 | 20 |
| <b>Day 9</b>  | Httex1pQ20        | 8.611  | 20 |
|               | Httex1pQ20 (10µM) | 7.672  | 20 |
|               | Httex1pQ93        | 8.177  | 20 |
|               | Httex1pQ93 (10µM) | 7.363  | 20 |
| <b>Day 11</b> | Httex1pQ20        | 8.672  | 20 |
|               | Httex1pQ20 (10µM) | 8.688  | 20 |
|               | Httex1pQ93        | 8.455  | 20 |
|               | Httex1pQ93 (10µM) | 7.452  | 20 |
| <b>Day 13</b> | Httex1pQ20        | 9.308  | 20 |
|               | Httex1pQ20 (10µM) | 9.308  | 20 |
|               | Httex1pQ93        | 8.427  | 20 |
|               | Httex1pQ93 (10µM) | 7.419  | 20 |

**Supplemental Table 19: Significance levels in trehalose content of different days old Httex1pQ20 and Httex1pQ93 flies reared on food supplemented without and with 10µM dose of curcumin.**

| Age (in days) | (Httex1pQ20, Httex1pQ93) | (I) (0 and 10µM) | (J) (0 and 10µM) | Mean Difference (I-J) | Sig. <sup>b</sup> |
|---------------|--------------------------|------------------|------------------|-----------------------|-------------------|
| <b>Day 0</b>  | Httex1pQ20               | 0                | 10µM             | -.164                 | .857              |
|               |                          | 10µM             | 0                | .164                  | .857              |
|               | Httex1pQ93               | 0                | 10µM             | .233                  | .798              |
|               |                          | 10µM             | 0                | -.233                 | .798              |
| <b>Day 3</b>  | Httex1pQ20               | 0                | 10µM             | 1.972*                | <b>.034</b>       |
|               |                          | 10µM             | 0                | -1.972*               | <b>.034</b>       |
|               | Httex1pQ93               | 0                | 10µM             | .869                  | .343              |
|               |                          | 10µM             | 0                | -.869                 | .343              |
| <b>Day 5</b>  | Httex1pQ20               | 0                | 10µM             | 1.233                 | .180              |
|               |                          | 10µM             | 0                | -1.233                | .180              |

|               |            |            |            |            |                   |
|---------------|------------|------------|------------|------------|-------------------|
|               | Httex1pQ93 | 0          | 10 $\mu$ M | 1.189      | .196              |
|               |            | 10 $\mu$ M | 0          | -1.189     | .196              |
| <b>Day 7</b>  | Httex1pQ20 | 0          | 10 $\mu$ M | .950       | .300              |
|               |            | 10 $\mu$ M | 0          | -.950      | .300              |
|               | Httex1pQ93 | 0          | 10 $\mu$ M | 4.592*     | <b>&lt;0.0001</b> |
|               |            | 10 $\mu$ M | 0          | -4.592*    | <b>&lt;0.0001</b> |
| <b>Day 9</b>  | Httex1pQ20 | 0          | 10 $\mu$ M | .939       | .306              |
|               |            | 10 $\mu$ M | 0          | -.939      | .306              |
|               | Httex1pQ93 | 0          | 10 $\mu$ M | .814       | .374              |
|               |            | 10 $\mu$ M | 0          | -.814      | .374              |
| <b>Day 11</b> | Httex1pQ20 | 0          | 10 $\mu$ M | -.017      | .985              |
|               |            | 10 $\mu$ M | 0          | .017       | .985              |
|               | Httex1pQ93 | 0          | 10 $\mu$ M | 1.003      | .274              |
|               |            | 10 $\mu$ M | 0          | -1.003     | .274              |
| <b>Day 13</b> | Httex1pQ20 | 0          | 10 $\mu$ M | -2.220E-15 | 1.000             |
|               |            | 10 $\mu$ M | 0          | 2.220E-15  | 1.000             |
|               | Httex1pQ93 | 0          | 10 $\mu$ M | 1.008      | .272              |
|               |            | 10 $\mu$ M | 0          | -1.008     | .272              |

Based on estimated marginal means

\*. The mean difference is significant at the .05 level.

b. Adjustment for multiple comparisons: Least Significant Difference (equivalent to no adjustments).

The significance values were calculated by ANOVA and pairwise comparisons.

**Supplemental Table 20: Lipid content in different days old untreated and 10 $\mu$ M curcumin treated Httex1pQ20 and Httex1pQ93 flies.**

| Age (in days) | Condition               | Mean ( $\mu$ g/fly) | <i>n</i> |
|---------------|-------------------------|---------------------|----------|
| <b>Day 0</b>  | Httex1pQ20              | 99.8                | 50       |
|               | Httex1pQ20 (10 $\mu$ M) | 103.62              | 50       |
|               | Httex1pQ93              | 107.64              | 50       |
|               | Httex1pQ93 (10 $\mu$ M) | 106.98              | 50       |
| <b>Day 3</b>  | Httex1pQ20              | 100.767             | 50       |

|               |                   |        |    |
|---------------|-------------------|--------|----|
|               | Httex1pQ20 (10µM) | 101.62 | 50 |
|               | Httex1pQ93        | 110    | 50 |
|               | Httex1pQ93 (10µM) | 96.76  | 50 |
| <b>Day 5</b>  | Httex1pQ20        | 84.26  | 50 |
|               | Httex1pQ20 (10µM) | 95.58  | 50 |
|               | Httex1pQ93        | 124.26 | 50 |
|               | Httex1pQ93 (10µM) | 125.58 | 50 |
| <b>Day 7</b>  | Httex1pQ20        | 87.8   | 50 |
|               | Httex1pQ20 (10µM) | 90.2   | 50 |
|               | Httex1pQ93        | 110.58 | 50 |
|               | Httex1pQ93 (10µM) | 81.28  | 50 |
| <b>Day 9</b>  | Httex1pQ20        | 84.58  | 50 |
|               | Httex1pQ20 (10µM) | 86.06  | 50 |
|               | Httex1pQ93        | 63.78  | 50 |
|               | Httex1pQ93 (10µM) | 52.12  | 50 |
| <b>Day 11</b> | Httex1pQ20        | 75.64  | 50 |
|               | Httex1pQ20 (10µM) | 81.48  | 50 |
|               | Httex1pQ93        | 53.3   | 50 |
|               | Httex1pQ93 (10µM) | 44.204 | 50 |
| <b>Day 13</b> | Httex1pQ20        | 90.1   | 50 |
|               | Httex1pQ20 (10µM) | 94.04  | 50 |
|               | Httex1pQ93        | 27.65  | 50 |
|               | Httex1pQ93 (10µM) | 26.17  | 50 |

**Supplemental Table 21: Significance levels in lipid content of 0 to 13 days old Httex1pQ20 and Httex1pQ93 flies reared on food supplemented without and with 10µM dose of curcumin.**

| Age (in days) | (Httex1pQ20, Httex1pQ93) | (I) (0 and 10µM) | (J) (0 and 10µM) | Mean Difference (I-J) | Sig. <sup>b</sup> |
|---------------|--------------------------|------------------|------------------|-----------------------|-------------------|
| <b>Day 0</b>  | Httex1pQ20               | 0                | 10µM             | -3.820                | .486              |
|               |                          | 10µM             | 0                | 3.820                 | .486              |

|               |            |      |      |          |                   |
|---------------|------------|------|------|----------|-------------------|
|               | Httex1pQ93 | 0    | 10μM | .660     | .904              |
|               |            | 10μM | 0    | -.660    | .904              |
| <b>Day 3</b>  | Httex1pQ20 | 0    | 10μM | -.853    | .876              |
|               |            | 10μM | 0    | .853     | .876              |
|               | Httex1pQ93 | 0    | 10μM | 13.253*  | <b>.017</b>       |
|               |            | 10μM | 0    | -13.253* | <b>.017</b>       |
| <b>Day 5</b>  | Httex1pQ20 | 0    | 10μM | -11.320* | <b>.040</b>       |
|               |            | 10μM | 0    | 11.320*  | <b>.040</b>       |
|               | Httex1pQ93 | 0    | 10μM | -1.320   | .809              |
|               |            | 10μM | 0    | 1.320    | .809              |
| <b>Day 7</b>  | Httex1pQ20 | 0    | 10μM | -2.400   | .661              |
|               |            | 10μM | 0    | 2.400    | .661              |
|               | Httex1pQ93 | 0    | 10μM | 29.300*  | <b>&lt;0.0001</b> |
|               |            | 10μM | 0    | -29.300* | <b>&lt;0.0001</b> |
| <b>Day 9</b>  | Httex1pQ20 | 0    | 10μM | -1.480   | .787              |
|               |            | 10μM | 0    | 1.480    | .787              |
|               | Httex1pQ93 | 0    | 10μM | 11.660*  | <b>.035</b>       |
|               |            | 10μM | 0    | -11.660* | <b>.035</b>       |
| <b>Day 11</b> | Httex1pQ20 | 0    | 10μM | -5.840   | .287              |
|               |            | 10μM | 0    | 5.840    | .287              |
|               | Httex1pQ93 | 0    | 10μM | 9.096    | .099              |
|               |            | 10μM | 0    | -9.096   | .099              |
| <b>Day 13</b> | Httex1pQ20 | 0    | 10μM | -3.940   | .472              |
|               |            | 10μM | 0    | 3.940    | .472              |
|               | Httex1pQ93 | 0    | 10μM | 1.480    | .787              |
|               |            | 10μM | 0    | -1.480   | .787              |

Based on estimated marginal means

\*. The mean difference is significant at the .05 level.

b. Adjustment for multiple comparisons: Least Significant Difference (equivalent to no adjustments).

The statistical values were calculated by ANOVA and pairwise comparisons.

**Supplemental Table 22: Surface area occupied by lipid droplets in the abdominal fat body in different days old (3, 7, 9, 11 and 13) normal and diseased flies supplemented without and with 10 $\mu$ M curcumin.**

| <b>Age (in days)</b> | <b>Condition</b>        | <b>Mean</b><br><b>[Surface area</b><br><b>occupied by</b><br><b>LDs (<math>\mu\text{m}^2</math>)]</b> | <b><i>n</i></b> |
|----------------------|-------------------------|-------------------------------------------------------------------------------------------------------|-----------------|
| <b>Day 3</b>         | Httex1pQ20 (10 $\mu$ M) | 6722.019881                                                                                           | 5               |
|                      | Httex1pQ93              | 7003.291834                                                                                           | 5               |
|                      | Httex1pQ93 (10 $\mu$ M) | 6729.87681                                                                                            | 5               |
| <b>Day 7</b>         | Httex1pQ20 (10 $\mu$ M) | 6480.937236                                                                                           | 5               |
|                      | Httex1pQ93              | 7274.12294                                                                                            | 5               |
|                      | Httex1pQ93 (10 $\mu$ M) | 6052.012224                                                                                           | 5               |
| <b>Day 9</b>         | Httex1pQ20 (10 $\mu$ M) | 7926.329486                                                                                           | 5               |
|                      | Httex1pQ93              | 6506.184474                                                                                           | 5               |
|                      | Httex1pQ93 (10 $\mu$ M) | 5429.623724                                                                                           | 5               |
| <b>Day 11</b>        | Httex1pQ20 (10 $\mu$ M) | 7947.126892                                                                                           | 5               |
|                      | Httex1pQ93              | 2409.823964                                                                                           | 5               |
|                      | Httex1pQ93 (10 $\mu$ M) | 3358.245552                                                                                           | 5               |
| <b>Day 13</b>        | Httex1pQ20 (10 $\mu$ M) | 8687.697628                                                                                           | 5               |
|                      | Httex1pQ93              | 2481.977753                                                                                           | 5               |
|                      | Httex1pQ93 (10 $\mu$ M) | 1733.565922                                                                                           | 5               |

**Supplemental Table 23: Mean ROS intensity in 7 and 13 day old control, untreated and 10 $\mu$ M curcumin treated diseased flies.**

| <b>Age (in days)</b> | <b>Condition</b>        | <b>Mean</b><br><b>ROS intensity</b> | <b><i>n</i></b> |
|----------------------|-------------------------|-------------------------------------|-----------------|
| <b>Day 7</b>         | Httex1pQ20              | 403.85                              | 7               |
|                      | Httex1pQ93              | 420.556                             | 7               |
|                      | Httex1pQ93 (10 $\mu$ M) | 343.682                             | 7               |
| <b>Day 13</b>        | Httex1pQ20              | 443.206                             | 7               |
|                      | Httex1pQ93              | 576.25                              | 7               |
|                      | Httex1pQ93 (10 $\mu$ M) | 427.488                             | 7               |



**Supplemental Table 24: Relative dSREBP, *bmm*, *lipin* mRNA level in 7 and 13 day old Httex1pQ20 and Httex1pQ93 flies reared without and with 10 $\mu$ M curcumin supplementation.**

| <b>Gene</b>         | <b>Age (in days)</b> | <b>Condition</b>        | <b>Mean</b> | <b><i>n</i></b> |
|---------------------|----------------------|-------------------------|-------------|-----------------|
| <b>dSREBP</b>       | Day 7                | Httex1pQ20              | 1.160602066 | 36              |
|                     |                      | Httex1pQ20 (10 $\mu$ M) | 0.502577221 | 36              |
|                     |                      | Httex1pQ93              | 1.066739216 | 36              |
|                     |                      | Httex1pQ93 (10 $\mu$ M) | 0.90073574  | 36              |
|                     | Day 13               | Httex1pQ20              | 0.433167521 | 36              |
|                     |                      | Httex1pQ20 (10 $\mu$ M) | 1.159997058 | 36              |
|                     |                      | Httex1pQ93              | 0.650322113 | 36              |
|                     |                      | Httex1pQ93 (10 $\mu$ M) | 1.691164267 | 36              |
| <b><i>bmm</i></b>   | Day 7                | Httex1pQ20              | 0.878094    | 36              |
|                     |                      | Httex1pQ20 (10 $\mu$ M) | 0.780336    | 36              |
|                     |                      | Httex1pQ93              | 1.173514    | 36              |
|                     |                      | Httex1pQ93 (10 $\mu$ M) | 1.203002    | 36              |
|                     | Day 13               | Httex1pQ20              | 0.716144    | 36              |
|                     |                      | Httex1pQ20 (10 $\mu$ M) | 0.912006    | 36              |
|                     |                      | Httex1pQ93              | 1.354708    | 36              |
|                     |                      | Httex1pQ93 (10 $\mu$ M) | 1.949996    | 36              |
| <b><i>lipin</i></b> | Day 7                | Httex1pQ20              | 0.704809    | 36              |
|                     |                      | Httex1pQ20 (10 $\mu$ M) | 0.660259    | 36              |
|                     |                      | Httex1pQ93              | 1.14853     | 36              |
|                     |                      | Httex1pQ93 (10 $\mu$ M) | 1.437892    | 36              |
|                     | Day 13               | Httex1pQ20              | 1.170937    | 36              |
|                     |                      | Httex1pQ20 (10 $\mu$ M) | 0.854101    | 36              |
|                     |                      | Httex1pQ93              | 1.561263    | 36              |
|                     |                      | Httex1pQ93 (10 $\mu$ M) | 2.411679    | 36              |
